1 **Melanopsin retinal ganglion cell-driven contribution to visual and cognitive brain responses in**

2 **LHON**

3

4 Stefania Evangelisti<sup>1\*</sup>, Chiara La Morgia<sup>2,3\*</sup>, Claudia Testa<sup>4°</sup>, David N Manners<sup>1</sup>, Leonardo Brizi<sup>4,5</sup>,  
5 Claudio Bianchini<sup>1</sup>, Michele Carbonelli<sup>3</sup>, Piero Barboni<sup>6</sup>, Alfredo A. Sadun<sup>7</sup>, Caterina Tonon<sup>1,8</sup>,  
6 Valerio Carelli<sup>2,3§</sup>, Gilles Vandewalle<sup>9§</sup>, Raffaele Lodi<sup>1,8§</sup>.

7

8 <sup>1</sup> Unità di RM Funzionale, Dipartimento di Scienze Biomediche e Neuromotorie, Università di  
9 Bologna, Bologna, Italy;

10

11 <sup>2</sup> Dipartimento di Scienze Biomediche e Neuromotorie, Università di Bologna, Bologna, Italy;

12

13 <sup>3</sup> IRCCS Istituto delle Scienze Neurologiche di Bologna, UOC Clinica Neurologica, Bologna, Italy;

14

15 <sup>4</sup> Dipartimento di Fisica ed Astronomia, Università di Bologna, Bologna, Italy;

16

17 <sup>5</sup> Centro Fermi - Museo Storico della Fisica e Centro Studi e Ricerche «Enrico Fermi», Roma, Italy;

18

19 <sup>6</sup> Studio Oculistico d'Azeglio, Bologna, Italy;

20

21 <sup>7</sup> Doheny Eye Institute, Department of Ophthalmology, David Geffen School of Medicine at  
22 University of California, Los Angeles, Los Angeles, California, United States;

23

24 <sup>8</sup> IRCCS Istituto delle Scienze Neurologiche di Bologna, Programma Neuroimmagini Funzionali e  
25 Molecolari, Bologna, Italy;

26

27 <sup>9</sup> Sleep and chronobiology lab; GIGA-Cyclotron Research Centre/In vivo imaging, University of  
28 Liège, Belgium.

29

30

31 \*Contributed equally; §Contributed equally

32 ° Corresponding author:

33

34 Claudia Testa, PhD

35 Department of Physics and Astronomy (DIFA), University of Bologna

36 Viale Bertini Pichat 6/23, 40127, Bologna (IT)

37 Phone: +39-051-302063, Fax: +39-051-303962

38 e-mail: [claudia.testa@unibo.it](mailto:claudia.testa@unibo.it)

39

40

41

42

43

1 **Abstract**

2 Melanopsin retinal ganglion cells (mRGCs) are intrinsically photosensitive photoreceptors  
3 contributing to visual and non-image-forming functions of the eye. Isolating mRGC roles in humans  
4 is challenging, therefore mRGCs functions remains to be fully characterized.  
5 We explored mRGCs contribution to light-driven visual and cognitive brain responses in Leber's  
6 Hereditary Optic Neuropathy (LHON), given mRGC relative sparing in LHON. Twelve patients and  
7 twelve matched healthy controls (HC) participated in an fMRI protocol including visual and visual-  
8 cognitive paradigms under blue (480nm) and red light (620nm).  
9 Higher occipital activation was found in response to sustained blue *vs.* red stimulation in LHON *vs.*  
10 HC. Similarly, brain responses to the executive task were larger under blue *vs.* red light in LHON  
11 over lateral prefrontal cortex.  
12 These findings are in line with LHON mRGCs relative sparing and support mRGCs contribution to  
13 non-visual and visual functions in humans, with potential implication for visual rehabilitation in optic  
14 neuropathy patients.

15

## 1 INTRODUCTION

2 Human rods and cones represent the main retinal photoreceptors of the image-forming system.  
3 However, another retinal photoreceptor system exists, relying heavily on melanopsin, a photopigment  
4 expressed in about 1% of retinal ganglion cells (RGCs) (Provencio et al., 2002). Melanopsin is  
5 maximally sensitive to blue light (~480nm) and melanopsin RGCs (mRGCs) are intrinsically  
6 photosensitive and characterized by sustained and sluggish responses to light (Berson et al., 2002;  
7 Dacey et al., 2005; Hankins et al., 2008). mRGCs are essential for the non-image-forming (NIF)  
8 functions of light, i.e. those functions of light that are not directly related to image-formation, such as  
9 circadian rhythm photoentrainment, pupillary light reflex, melatonin suppression, as well as the  
10 regulation of alertness, sleep and cognition (Gooley et al., 2012; Sand et al., 2012; Gaggioni et al.,  
11 2014). Recent evidences also support an involvement of mRGCs in visual processes, such as  
12 brightness detection and coarse image formation (Hankins et al., 2008; Ecker et al., 2010; Gooley et  
13 al., 2012; Sand et al., 2012; Gaggioni et al., 2014; Allen et al., 2019). mRGCs main central  
14 projections include the hypothalamic suprachiasmatic nucleus (SCN), site of the master circadian  
15 clock, the hypothalamic preoptic area implicated in sleep initiation, the olivary pretectal nucleus  
16 regulating pupil size, the medial amygdala, part of the olfactory and emotional response (Hattar et al.,  
17 2006; Hannibal et al., 2014). mRGCs also project to regions typically part of the visual pathway,  
18 such as the dorsal division of thalamus LGN and the midbrain superior colliculus (Hannibal et al.,  
19 2014).  
20 Light stimulates cognitive brain activity (Vandewalle et al., 2009; Mitolo et al., 2018) and functional  
21 MRI (fMRI) studies showed that, in normally sighted individuals, light, geared towards mRGCs  
22 increases brain activity over the frontal eye field and inferior frontal cortex (Hung et al., 2017) and  
23 potentially in a region encompassing the suprachiasmatic nucleus (McGlashan et al., 2018).  
24 Likewise, the NIF system was shown to modulate attentional, executive and emotional functions,  
25 likely through mRGCs (Chellappa et al., 2014) with maximal efficiency with blue light around 460-  
26 480nm (Gaggioni et al., 2014). However, rod and cone photoreception, contribute to mRGC light

1 responses (Güler et al., 2008; Gaggioni et al., 2014; Chellappa et al., 2014), making the isolation of  
2 mRGC specific roles challenging in humans.

3 Outer retina degeneration in totally blind patients has been used as a successful model to demonstrate  
4 mRGC contribution to NIF functions (Czeisler et al., 1995; Zaidi et al., 2007; Gooley et al., 2012;  
5 Hull et al., 2018) and to evaluate the NIF impact of light on cognition (Vandewalle et al., 2013,  
6 2018). Study samples were however small due to the rarity of the phenotype, making a generalization  
7 of mRGC signalling impact on cognition uncertain.

8 Leber's hereditary optic neuropathy (LHON, estimated prevalence: 1:45,000) (Mascialino et al.,  
9 2012) is a maternally inherited blinding disorder due to mitochondrial dysfunction (Carelli et al.,  
10 2004). This is usually due to one of three mitochondrial DNA (mtDNA) point mutations  
11 (m.11778G>A/MT-ND4, m.14484T>C/MT-ND6, m.3460G>A/MT-ND1) that affect genes encoding  
12 complex I subunits (ND) of the respiratory chain (Carelli et al., 2004). In LHON patients, optic nerve  
13 atrophy occurs consequent to degeneration of RGCs in the inner retina, whereas outer retina rods and  
14 cones are preserved. Structural MR showed microstructural alterations along the visual pathway  
15 (Rizzo et al., 2012; Manners et al., 2015) and grey matter loss in the visual cortex (Barcella et al.,  
16 2010). Yet, despite the loss of regular RGCs, mRGCs are remarkably well preserved in LHON, as  
17 demonstrated by retinal *post-mortem* histopathology and *in-vivo* preservation of light-induced  
18 suppression of nocturnal melatonin secretion (La Morgia et al., 2010) and PLR (Kawasaki et al.,  
19 2010; Moura et al., 2013). Since LHON is relatively common compared to outer retinal degeneration,  
20 it provides a unique opportunity to further characterize functions of relatively preserved mRGC in the  
21 context of the severe optic nerve atrophy with increased statistical power. We reasoned that the  
22 important RGC neurodegeneration, would blunt image-forming photoreception generated by intact  
23 rods and cones, whereas preserved mRGCs NIF-image-forming and image-forming contributions  
24 would be emphasized.

25 We recorded brain activity of LHON patients and healthy controls (HC) in fMRI while exposed to  
26 blue (480 nm) and red (620 nm) light of different durations, in conjunction or not with a cognitive

1 task. We could therefore explore both NIF and image-forming impacts, in the setting of disease-  
2 induced loss of regular RGCs. As for the image-forming effects, we anticipated that blue and red  
3 lights would have a similar impact on occipital pole activity in HC, while in LHON patients, in which  
4 mRGCs can represent up to 30% of the remaining RGC (as opposed to ~1% in HC), blue light would  
5 trigger larger occipital cortex activation than red light, particular for longer duration exposure (50s)  
6 compared to the short stimulation. As for the NIF impact of light in visuo-cognitive context, we  
7 anticipated that the differential impact of blue vs. red light on ongoing cognitive activity would be  
8 larger in LHON patients, with relatively more mRGCs, as compared in HC. Since MR scanner static  
9 magnetic field was lower than previous studies in HC (1.5T vs. 3T), we anticipated that difference  
10 between light conditions would be most prominent in patients.

11  
12

13

14

## 1 RESULTS

2

### 3 Demographic, clinical and behavioural results

4 LHON patients and HC did not significantly differ in terms of age (mean  $\pm$  sd, LHON:  $38.2 \pm 12.9$   
5 years, HC:  $37.8 \pm 13.7$  years, t-test  $p=0.95$ ), gender (M/F, LHON: 10/2, HC: 8/4, Pearson's  $\chi^2$  Test  
6  $p=0.35$ ) and average number of hours of light at the time of fMRI acquisitions (mean  $\pm$  sd, LHON:  
7  $12.6 \pm 2.1$ , HC:  $12.7 \pm 2.2$ , t-test  $p=0.95$ ).

8 None of the participants had an extreme morning-evening chronotype (mean  $\pm$  sd, LHON:  $59.8 \pm 9.3$ ,  
9 HC:  $57.4 \pm 5.0$ ,  $p=0.44$ ), nor presented excessive sleep-wake disturbances, as evaluated by PSQI  
10 (LHON:  $4.9 \pm 2.3$ , HC:  $3.7 \pm 2.2$ ,  $p=0.22$ ), ESS (LHON:  $6.8 \pm 3.8$ , HC:  $7.3 \pm 1.4$ ,  $p=0.65$ ) and Berlin  
11 questionnaires. Beck anxiety and depression scores were normal in all participants (respectively  
12 LHON:  $12.6 \pm 7.7$ , HC:  $5.4 \pm 6.8$ ,  $p=0.05$  and LHON:  $7.2 \pm 6.5$ , HC:  $5.9 \pm 2.9$ ,  $p=0.55$ ), except for  
13 two patients who presented mild to moderate levels of anxiety and depression. Ophthalmological data  
14 of LHON patients are reported in Table 1. Fundus examination revealed a diffuse optic atrophy for  
15 all LHON participants, and Ishihara's Test score was 0/12 for all of them. Visual field examination  
16 was not available for two LHON patients with a very severe visual loss for which the exam was not  
17 reliable. For the same reason, for 4 out of 12 LHON patients the VF of only one eye was considered  
18 for subsequent analyses. The duration of the disease in LHON patients was  $17 \pm 12$  years and the  
19 average visual acuity for the entire cohort of LHON patients was 20/630. Average RNFL thickness,  
20 as evaluated by OCT, was  $45.3 \pm 5.1$  microns. HC subjects had normal ophthalmological exam  
21 including OCT and visual acuity was 20/20 in all of them.

22 At the second training session, all the participants reached at least 75% of accuracy in both n-back  
23 tasks. Over the whole study cohort, there was a modest but significant improvement of performances  
24 between the first training (during the week before MRI acquisitions) and the second one (just before  
25 MRI acquisitions) in the 3-back task (paired t-test,  $p=0.020$ , mean first training: 85.7%, mean second  
26 training: 89.3%).

1 As for the accuracy to n-back tasks during fMRI acquisition, as intended given the short block  
2 duration of both task and light exposures, there was no significant main effect of group (0-back:  
3  $F=0.552$   $p=0.473$ ; 3-back:  $F=0.759$   $p=0.402$ ), nor light condition (0-back:  $F=2.861$   $p=0.113$ ; 3-back:  
4  $F=3.732$   $p=0.056$ ), as well as no significant interaction between group and light condition (0-back:  
5  $F=1.379$   $p=0.272$ ; 3-back:  $F=1.932$   $p=0.174$ ). These results imply that the fMRI results were not  
6 biased by significant differences in the cognitive task performances.

7

1 **Table 1. Clinical and ophthalmological evaluations for LHON patients.** (*DD: disease duration;*  
2 *LE: left eye; RE: right eye; VA: visual acuity; HM: hand motion; VF: visual field; MD: mean defect;*  
3 *RNFL: retinal nerve fibre layer; avg=average, T: temporal; S: superior; N: nasal; I: inferior; n.e.:*  
4 *not executed, due to unfeasibility).*  
5

| ID | Sex | Age (yrs) | Mutation  | DD (yrs) | VA      |         | Description                                            | VF     |            |        |            | RNFL |    |    |    |    |     |    |    |    |    |
|----|-----|-----------|-----------|----------|---------|---------|--------------------------------------------------------|--------|------------|--------|------------|------|----|----|----|----|-----|----|----|----|----|
|    |     |           |           |          | LE      | RE      |                                                        | LE     |            | RE     |            | LE   |    |    |    | RE |     |    |    |    |    |
|    |     |           |           |          |         |         |                                                        | MD     | fovea      | MD     | fovea      | avg  | T  | S  | N  | I  | avg | T  | S  | N  | I  |
| 1  | M   | 22        | 11778/ND4 | 5        | 20/800  | 20/2000 | generalized defect                                     | -33.03 | not active | -34.1  | not active | 45   | 31 | 55 | 44 | 51 | 47  | 31 | 59 | 45 | 54 |
| 2  | M   | 27        | 11778/ND4 | 10       | 20/1250 | 20/400  | central scotoma right eye; generalized defect left eye | -30.95 | not active | -16.95 | 18         | 39   | 27 | 5  | 2  | 36 | 39  | 27 | 62 | 33 | 33 |
| 3  | M   | 29        | 11778/ND4 | 4        | 20/1600 | 20/2000 | n.e.                                                   | n.e.   | n.e.       | n.e.   | n.e.       | 44   | 38 | 56 | 46 | 37 | 47  | 32 | 60 | 42 | 54 |
| 4  | M   | 29        | 11778/ND4 | 12       | 20/2000 | 20/1600 | generalized defect right eye                           | n.e.   | not active | -34.03 | not active | 41   | 44 | 35 | 45 | 41 | 32  | 27 | 40 | 34 | 25 |
| 5  | M   | 40        | 11778/ND4 | 13       | 20/320  | 20/2000 | generalized defect                                     | -32.96 | n.e.       | n.e.   | n.e.       | 51   | 30 | 73 | 52 | 47 | 56  | 45 | 73 | 43 | 61 |
| 6  | F   | 54        | 11778/ND4 | 24       | 20/2000 | 20/630  | n.e.                                                   | n.e.   | n.e.       | n.e.   | n.e.       | 40   | 27 | 54 | 36 | 43 | 41  | 36 | 53 | 33 | 42 |
| 7  | M   | 59        | 11778/ND4 | 32       | 20/500  | 20/2000 | generalized defect                                     | -30.99 | not active | -31.45 | not active | 50   | 29 | 49 | 60 | 61 | 43  | 27 | 56 | 39 | 51 |
| 8  | M   | 34        | 3460/ND1  | 17       | 20/630  | 20/400  | generalized defect                                     | -31.78 | not active | -27.14 | not active | 48   | 40 | 67 | 35 | 52 | 47  | 40 | 54 | 52 | 41 |
| 9  | F   | 60        | 3460/ND1  | 49       | 20/320  | 20/200  | central scotoma bilaterally                            | -18.05 | 4          | -19.64 | 0          | 53   | 32 | 66 | 46 | 69 | 47  | 29 | 57 | 48 | 54 |
| 10 | M   | 39        | 3890/ND1  | 9        | 20/1250 | 20/1000 | generalized defect                                     | n.e.   | n.e.       | -33.42 | not active | 50   | 38 | 57 | 50 | 57 | 48  | 40 | 63 | 51 | 38 |
| 11 | M   | 29        | 14258/ND6 | 13       | 20/630  | 20/630  | generalized defect                                     | -27.33 | <0         | -27.72 | <0         | 45   | 34 | 54 | 43 | 51 | 48  | 30 | 55 | 59 | 49 |
| 12 | M   | 36        | 14484/ND6 | 20       | 20/1000 | 20/125  | generalized defect                                     | n.e.   | n.e.       | -32.04 | 20         | 38   | 29 | 43 | 36 | 42 | 37  | 32 | 39 | 39 | 39 |



## 1 **Narrowband light stimulations**

2 We first considered the impact of light exposure only, i.e. independent of the presence of a cognitive  
3 task. Brain responses to narrowband light stimulation were considered for three different durations of  
4 light stimuli: transient effects (light onset) and 10s, during the pure visual paradigm, and 50s  
5 sustained effects during the visual-cognitive paradigm.

6 At light onset, activations of the primary visual cortex were detected in both groups for both light  
7 conditions, but with a greater extent in HC. Significantly higher response was detected in HC  
8 compared to LHON patients under blue light. No significant differences were detected when blue  
9 and red light were compared in either groups, and no significant difference in blue vs. red light were  
10 detected across groups (Figures 1 and 2, Supplementary Table 1).

11 Both groups showed sustained responses to 10s and 50s exposure to blue light over several parts of  
12 the primary visual cortex. In contrast, sustained visual cortex responses to 10s and 50s red light  
13 exposure were only detected in HC. Accordingly, sustained responses to both 10 and 50s red light  
14 were significantly higher in HC than in LHON patients.

15 When assessing the interaction between light conditions and groups, sustained responses were greater  
16 under blue vs. red light exposure in patients relative to HC in the occipital cortex for both 10 and 50s  
17 (Figures 1 and 2, Supplementary Table 1).

18 No significant correlations were found in LHON patients between functional visual responses under  
19 either blue or red light and ophthalmological data, namely visual acuity, visual fields and retinal  
20 nerve fibre layer thickness.

21

22

23

24

25

26

1  
2  
3  
4  
5  
6  
7  
8  
9  
10  
11  
12  
13  
14  
15  
16  
17  
18  
19  
20  
21  
22  
23  
24  
25  
26  
27  
28  
29

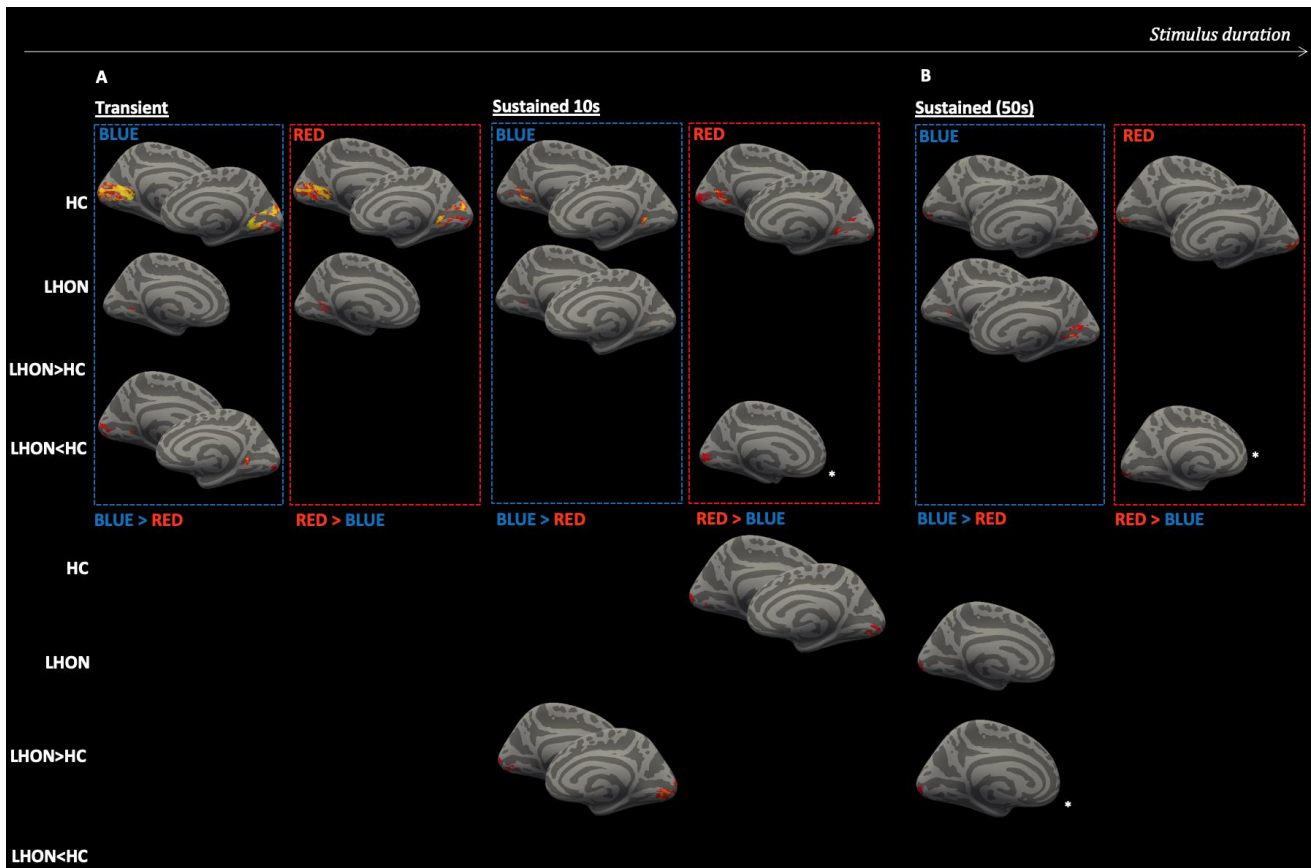

**Figure 1. Brain responses to light stimulations.** Significant (TFCE-corrected  $p < 0.05$ ) results for LHON and HC brain response to transient effects at light onset (A, left), 10s sustained effects (A right) and 50s sustained effects (B). A: light stimulation effects from the pure visual paradigm; B: light stimulation effects from the visual-cognitive paradigm (the contribution of the cognitive task being regressed out). For the contrasts that gave no significant results, no brain images are shown. Only for the visualization, the results were registered and projected onto freesurfer fsaverage brain surface (left hemisphere on the right). (LHON: Leber's hereditary optic neuropathy; HC: healthy controls; \*: only for visualization purposes clusters are shown at  $p < 0.1$  (clusters were however found at  $p < 0.05$ , see Supplementary Table 1).

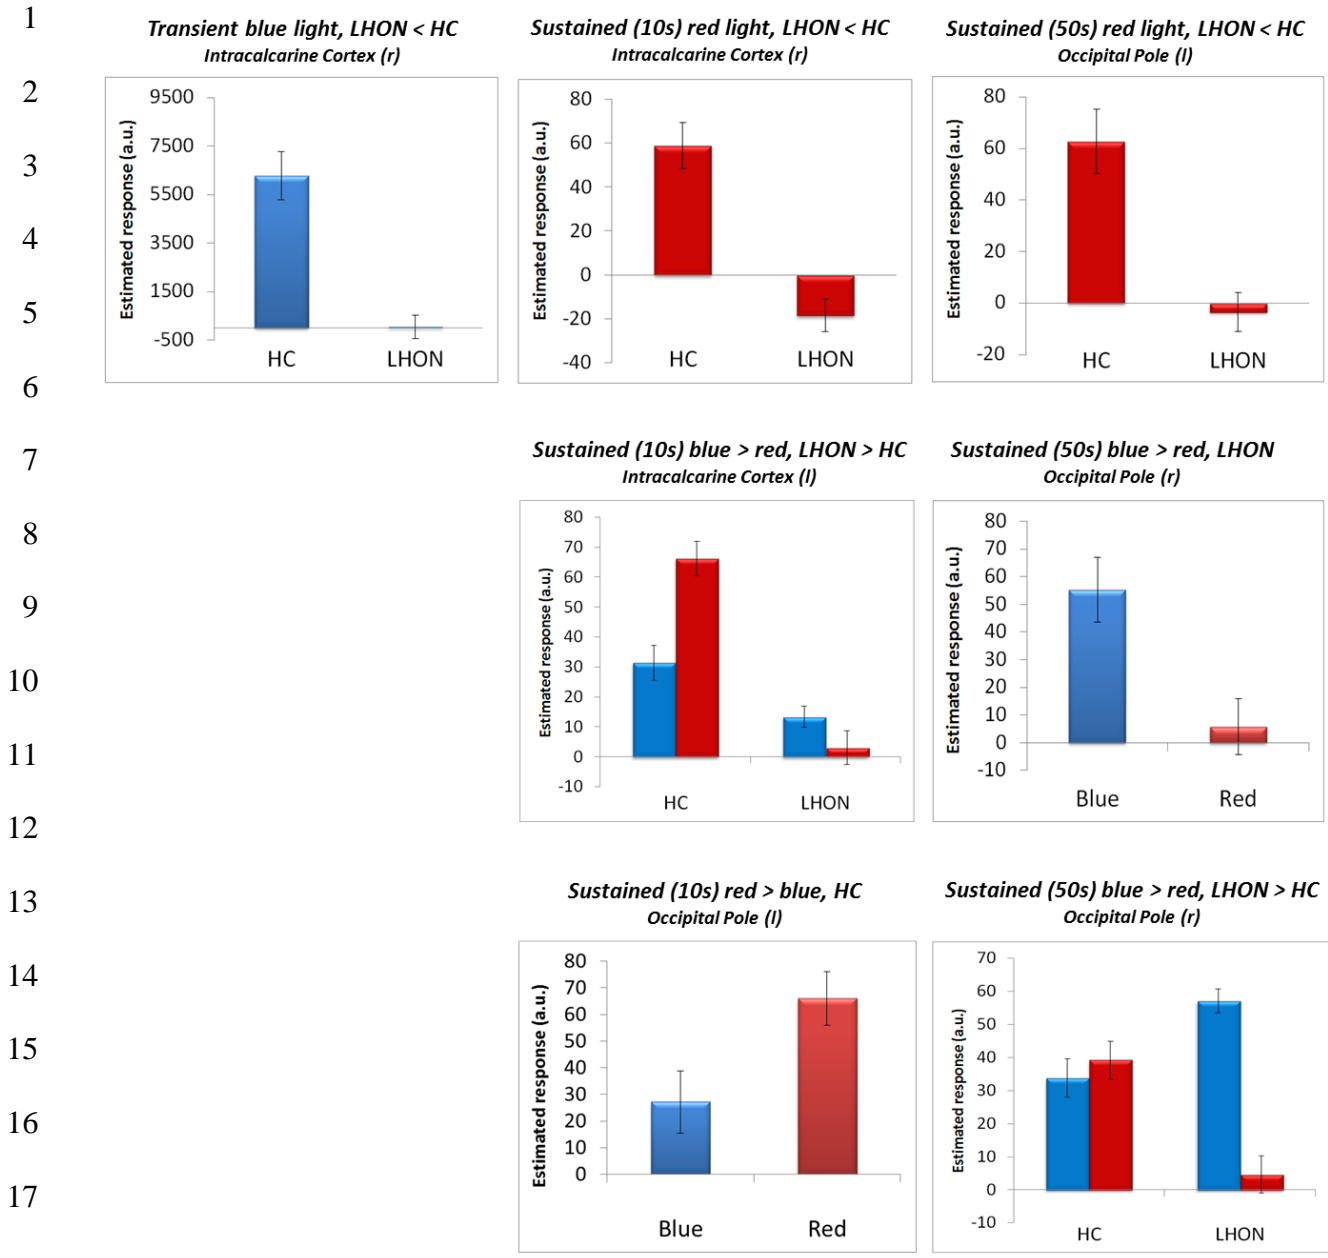

19 **Figure 2. Bar plot of brain responses to light stimulations.** Bar plots describing the mean  
 20 parameters estimates of the significant voxels that were found for the comparisons between light  
 21 conditions and/or groups (average in arbitrary units  $\pm$  standard error of the mean). A representative  
 22 brain response, taken from the main significant cluster, is displayed for each contrast yielding a  
 23 significant difference.

## 1 **Light modulation of cognitive brain responses**

2 Executive brain responses, isolated by subtracting 0-back brain responses from 3-back responses,  
3 were observed in the typical brain areas sustaining working memory (Collette et al., 2006) and  
4 similar between the two groups, and encompassed the prefrontal, parietal and cingulate cortices,  
5 thalamus, and putamen (Supplementary Figure 1; Supplementary Table 2). No group differences  
6 were detected suggesting that both patients and HC successfully and similarly performed both tasks.  
7 We then examined whether executive brain responses were affected in a wavelength-dependent  
8 manner. Analyses reveal that, compared to red light exposure, blue light exposures increased  
9 executive brain responses in LHON patients in the middle frontal gyrus (Figure 3, Supplementary  
10 Table 3). No such a significant difference was detected in HC and groups did not significantly differ  
11 when considering the differential impact of light wavelength on executive responses.  
12 In addition, no significant correlations were found in LHON patients between functional brain  
13 cognitive responses under either blue or red light and ophthalmological data, namely visual acuity,  
14 visual fields and retinal nerve fibre layer thickness.

15  
16  
17  
18  
19  
20  
21  
22  
23  
24

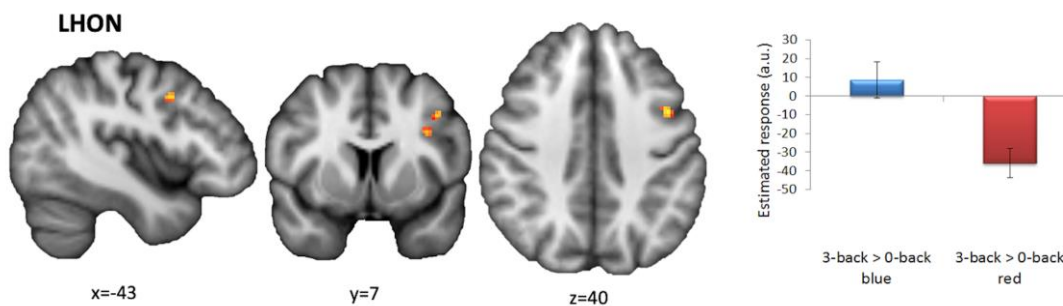

25 **Figure 3. Brain response in LHON patients is modulated by light conditions during the attentive**  
26 **task.** Significant (TFCE-corrected  $p < 0.05$ ) results for brain responses to the interaction between 3-  
27 back task and different light conditions. Results are shown only for LHON group effect since other  
28 contrasts in HC gave no significant results.

29 The background image is an average of individual T1-w scans - in radiological convention. Only for  
30 visualization purposes the cluster is shown at  $p < 0.1$  (it was however found significant at  $p < 0.05$ , see  
31 Supplementary Table 3). The bar plot describing the mean parameters estimates is reported in the  
32 lateral panel.

## 1 **DISCUSSION**

2  
3 This study investigated the light-driven modulation of brain activity by mRGCs through fMRI in a  
4 cohort of chronically and severely affected LHON patients, large enough to allow for group level  
5 statistical inferences (and therefore effect generalization). LHON provides an unparalleled  
6 opportunity to test the visual impact of mRGCs on the human brain, as the neurodegenerative process  
7 substantially ablates the general population of RGCs that contribute to formed vision - without  
8 affecting rods and cones – while leaving mRGCs relatively preserved.

9 In line with our hypotheses, the results first demonstrated significantly higher primary visual cortex  
10 sustained activation in response to blue compared to red light stimulation in LHON compared to HC.  
11 In particular, we found V1 cortex activation with both blue and red light at all stimuli durations  
12 (transient, sustained 10s and 50s) in HC subjects, whereas for LHON V1 activation was evident only  
13 in response to blue light. It appears therefore that our findings arise from a greater relative difference  
14 between light conditions (blue vs. red) in LHON patients compared with HC. In addition to  
15 recordings of brain activity related to light exposure, our protocol also investigated whether mRGC  
16 photoreception would affect an ongoing cognitive brain activity by including an auditory working  
17 memory task in one of the fMRI sessions. Interestingly, and as anticipated, executive brain responses  
18 were differentially affected by light wavelength, with blue light associated with higher activations  
19 than red light, in LHON patients over the lateral prefrontal cortex (or middle frontal areas) typically  
20 involved in higher executive function (Otero and Barker, 2014).

21 A few studies investigated the NIF impact of light without simultaneous cognitive task completion  
22 (Hung et al., 2017; McGlashan et al., 2018) and they did not isolate activity over the occipital cortex.  
23 The present findings strongly suggest that the output of the remaining mRGCs, most sensitive to blue  
24 wavelength, is also including the occipital cortex implying a possible role in visual functions. These  
25 findings also support previous studies pointing to a relative sparing of mRGCs in LHON (La Morgia  
26 et al., 2010; Moura et al., 2013) and support the inference that the mRGC signal indirectly feeds to  
27 the brain cortex mostly devoted to vision in humans, in addition to their classical role in circadian

1 photoentrainment and other NIF functions (Hankins et al., 2008; Vandewalle et al., 2013, 2018;  
2 Spitschan et al., 2017). Overall our data imply that mRGC signal modulates occipital activity,  
3 potentially contributing to visual function in human beings. Since our LHON patient sample was  
4 normal and comparable to the HC sample, except for their visual dysfunction, these findings are  
5 indeed going beyond the particular cases of LHON patients.

6 Other evidences supporting the role of mRGCs in cortical visual processes (Sonoda and Schmidt,  
7 2016) include a direct retinofugal projection of mRGCs to the LGN that, in turn, projects to the  
8 primary visual cortex (V1) in mice (Hattar et al., 2006; Hatori et al., 2008; Ecker et al., 2010), rats  
9 (Langel et al., 2015) and non-human primates (Dacey et al., 2005; Hannibal et al., 2014).

10 Furthermore, neurophysiological studies in mice suggest that mRGCs can support spatial visual  
11 perception (discrimination of very coarse patterns) in animals lacking the classical rod-cone outer  
12 retinal system (Ecker et al., 2010). These physiological studies point to a sustained and scalable  
13 response to light stimulation mediated by the dorsal LGN (dLGN) (Brown et al., 2010) in photopic  
14 conditions (Davis et al., 2015; Moulard et al., 2017). Melanopsin RGCs may drive a generalized  
15 increase of dLGN excitability, conveying information about changing background light intensity and  
16 increasing the signal/noise for fast visual responses (Storchi et al., 2015). mRGC projections to the  
17 LGN may help in the encoding of visual images by increasing the thalamic representation of scenes  
18 in reference to total radiance (Allen et al., 2017). Moreover, knockout mice for melanopsin show an  
19 impoverished coding of natural scenes suggesting the influence of mRGCs on the spatial and  
20 temporal tuning of dLGN neurons (Allen et al., 2014).

21 Melanopsin RGCs also contribute to visual processing through the maintenance of the pupil light  
22 reflex and light avoidance behaviour (Johnson et al., 2010). Finally, a melanopsin system  
23 contribution to brightness discrimination has been demonstrated in mice with and without retinal  
24 degenerations (Brown et al., 2012). Psychophysical experiments in healthy human subjects have  
25 shown a similar role in brightness perception (Brown et al., 2012; Zele et al., 2018a) and suggested  
26 the mRGC capacity to signal slowly changing stimuli of light colour (Zele et al., 2018b). Further

1 support for the contribution of melanopsin to human vision is provided by recent evidence that spatial  
2 patterns that were spectrally indistinguishable for cones but had contrast for melanopsin could be  
3 discriminated by healthy human subjects (Allen et al., 2019). Likewise an fMRI study in four healthy  
4 subjects demonstrated that high contrast melanopsin-specific light stimuli elicited a response in the  
5 primary visual cortex, associated with a brightening of visual perception (Spitschan et al., 2017). The  
6 class of mRGCs that more likely play a role in visual forming functions is represented by the M4  
7 subtype, which are most similar to the conventional RGC subtype by being highly sensitive to  
8 contrast (Schmidt et al., 2014). Specifically, melanopsin photosensitivity contribution of M4 cells  
9 output is particularly important for contrast sensitivity functions (Schroeder et al., 2018). It is  
10 therefore possible that the blue light-induced occipital activity we report in LHON arise from M4  
11 subtype.

12 Melanopsin-mediated modulation of cognitive brain activity was previously found in sighted subjects  
13 over the same lateral prefrontal cortex areas we isolate in LHON patients (Vandewalle et al., 2007).  
14 However, we did not find significant differences between executive responses under blue and red  
15 light periods in HC as well as no significant difference between groups. The fact that we found a  
16 significant difference in the comparison between blue and red light only in LHON patients but not in  
17 HC is presumably due to the higher ratio mRGCs/RGCs reported in LHON. The absence of group  
18 differences and light condition difference in HC arises in our view from 2 main factors: i) the smaller  
19 sample size, although within good practice suggestion for fMRI studies (Desmond and Glover, 2002)  
20 (previous studies in sighted individual included up to 16 volunteers (Vandewalle et al., 2011;  
21 Chellappa et al., 2014)), and ii) the reduced magnetic strength (1.5T vs. 3T), leading to a lower signal  
22 and SNR and time required for a brain volume acquisition (3s vs. ~2s) (Vandewalle et al., 2007,  
23 2011, 2013). We further emphasize that, despite all these limitations, we were able to isolate a light  
24 condition impact while performing a cognitive task in part of our sample (and across both groups  
25 without cognitive tasks – cf. above). The fact that differential impact of light wavelength on ongoing  
26 brain activity was most evident in the LHON group gives further support to a predominant role of

1 mRGCs in modulating ongoing cognitive activity. Aside from a maximal sensitivity to blue light  
2 compared to other wavelengths (Vandewalle et al., 2007, 2013) a similar result was previously  
3 suggested in a study in sighted healthy young volunteers in which prior light history was manipulated  
4 to affect mRGC sensitivity (Chellappa et al., 2014), and in 3 totally blind subjects due to outer retinal  
5 disorders, with no conscious vision but retained NIF photoreception (Vandewalle et al., 2013).  
6 As it is challenging to isolate mRGCs in normal vision (Allen et al., 2019), we cannot exclude a  
7 contribution from residual RGCs to our findings and therefore from rods and cones, which are  
8 preserved in LHON. However, we observe differences between light conditions and/or LHON and  
9 controls in terms of brain activation for longer duration stimuli, which is compatible with a  
10 melanopic signature, as opposed to the typically transient response of classical photoreceptors.  
11 Finally, despite brain response modulations by blue light in LHON, we did not find an effect of light  
12 on behavioural performances. This is not unexpected, given that, as in previous studies in healthy  
13 subjects (Vandewalle et al., 2007), we were careful at keeping task blocks short to avoid any  
14 behavioural effects that could contaminate the results. Both patients and controls are cognitively  
15 intact and our light stimulation scheme included short exposures to light (< 1 min), which differs  
16 markedly from what is described for other investigation meant to trigger improvements in cognitive  
17 performance, i.e. hour long exposures, sometimes repeated over a week (Mitolo et al. 2018).  
18 To our knowledge, the present study is the first to explore the effect of light on human brain activity  
19 in subjects affected by an inherited optic neuropathy, in particular in LHON that is characterized by a  
20 selective relative sparing of the mRGC system and support the idea that mRGC specifically activate  
21 the occipital cortex in LHON patients, even when the brain is not engaged in a cognitive challenge,  
22 and the prefrontal cortex when engaged in a cognitive process. In conclusion, these results support an  
23 indirect role of mRGCs for both NIF and visual forming functions in humans and in LHON patients  
24 in particular, opening potential windows for therapy in these patients.

25

26



## 1 MATERIALS AND METHODS

### 2 Subjects

3 Twelve patients with LHON and twelve age-matched controls participated to the study. Patients were  
4 consecutively recruited at the Neuro-ophthalmology Clinic, IRCCS Istituto di Scienze Neurologiche  
5 di Bologna, UOC Clinica Neurologica, Ospedale Bellaria, Italy. Healthy control (HC) subjects were  
6 recruited on a volunteer basis among Hospital and University co-workers. Local Ethical Committee  
7 approved the study (EC reference ID #14004), according to the Declaration of Helsinki, and all the  
8 participants gave their written informed consent.

9 Inclusion criterion for patients was a genetically confirmed diagnosis of LHON. Exclusion criteria  
10 for both patients and HC were contraindications to MR examination, neurological or psychiatric  
11 diseases, use of drugs acting on central nervous system or on sympathetic and parasympathetic  
12 system and excessive caffeine (> 4 cups/day) or alcohol (> 14 units/week) consumption; we also  
13 excluded volunteers who were shift-workers during the previous year, or had travelled through more  
14 than one time zone during the previous 2 months. Other exclusion criteria for HC were ocular  
15 hypertension, lens opacity, retinal or optic nerve diseases including macular degeneration and colour  
16 vision abnormalities. The Morningness-eveningness questionnaire was used to assess subjects'  
17 chronotype (Horne and Ostberg 1976). The Pittsburgh Sleep Quality Index Questionnaire  
18 (pathological score >5) (Buysse et al., 1989) and the Berlin questionnaire (Netzer et al., 1999) were  
19 used to assess the presence of sleep disturbances, and the Epworth Sleepiness Scale for excessive  
20 daytime sleepiness (ESS $\geq$ 11) (Vignatelli et al., 2003). Beck Anxiety Inventory (Beck et al., 1988)  
21 and 21-item Beck Depression Inventory scales (Beck et al., 1961) were used to evaluate anxiety and  
22 depression levels in the study cohort (pathological score  $\geq$ 14).

23

24

25

26

## 1 **Study Design**

### 2 *Before fMRI sessions*

3 During the week preceding the fMRI session, participants were asked to follow a regular sleep  
4 schedule (maintaining their habitual sleep routine, with a tolerance interval of 1 hour), to be reported  
5 in sleep diaries, and they were also asked to refrain from caffeine, alcohol or other substances acting  
6 on central nervous system for 3 days before the MR session. Moreover, participants were trained to  
7 the cognitive task administered inside the MR scanner (see below; Training 1, Figure 4-A).

8

### 9 *fMRI session*

10 For all participants, acquisitions were performed 4 hours after habitual wake time. Since the seasonal  
11 variation in environmental light at the time of acquisition may affect cognitive brain activity (Meyer  
12 et al., 2016), the average number of hours of light per-day at the time of MR session for each subject  
13 (data from Bologna Guglielmo Marconi Airport weather station, monthly average) was taken into  
14 account in all analyses.

15 On the experimental day, subjects were first exposed to white light (1000-1500 lux) for 5 minutes  
16 upon arrival, in order to standardize photic history across participants and level out this potential bias  
17 (Chellappa et al., 2014), and 1 or 2 drops of tropicamide 0.5% were administered to both eyes to  
18 induce mydriasis and cycloplegia. The subjects were then blindfolded and stayed in a dark room for  
19 one hour before the fMRI acquisitions. During the dark adaption, subjects underwent a short second  
20 training to the cognitive task (Training 2, Figure 4-A).

21

22

23

24

25

26

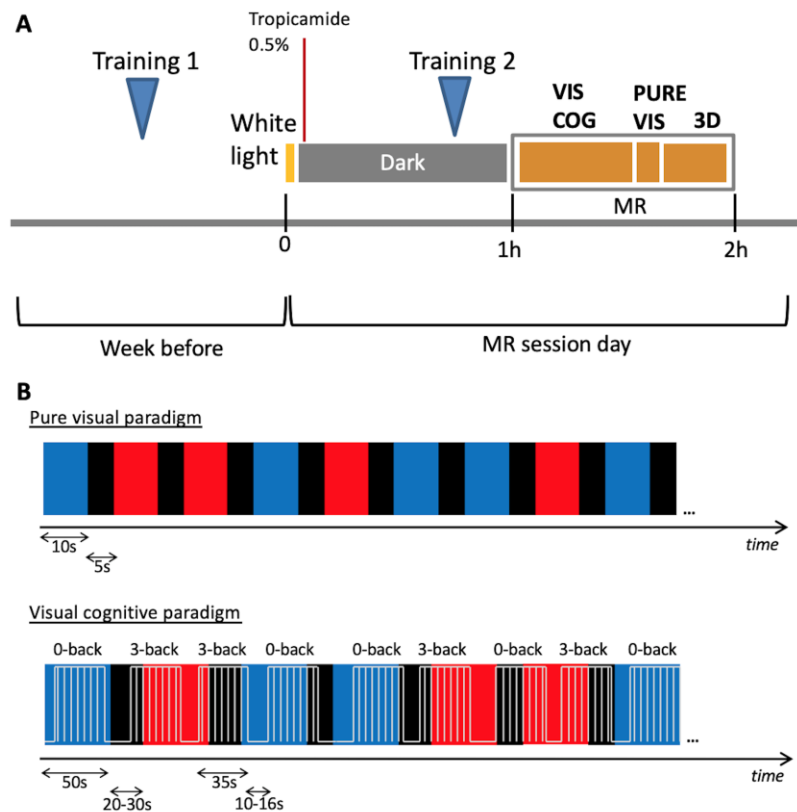

**Figure 4. Experimental protocol (A) and schematic representation of fMRI paradigms (B).** An example of a sequence of light stimulation (red or blue) is provided, together with the cognitive tasks in the lower display. For representation purposes, time axes are not in scale. (VIS COG: visual cognitive paradigm, PURE VIS: pure visual paradigm, 3D: volumetric structural image).

### Light exposure

Narrow interference band-pass filters were used to produce both narrowband illuminations: blue - 480nm (Full width at half maximum (FWHM): 10nm)- and red - 620nm (FWHM: 10 nm). The blue wavelength was meant to correspond to melanopsin maximal sensitivity, while the red light was equally away from the peak sensitivity of the photopic visual system (i.e. 550nm), while being close to undetected by mRGCs.

A filter wheel (AB301-T, Spectral Products, NM) was computer-controlled to switch band-pass filters and thereby change light wavelength. The light was transmitted by a metal-free purpose-built optic fibre (Fiberoptics Technology Inc, CT) from a source (DC951H illuminator, EKE lamp, Dolan-Jenner) to two small diffusers placed in front of the subjects' eyes (Ground glass diffuser 220 Grit,

1 Thorlabs). Diffusers were designed for the purpose of this study and ensured a reasonably uniform  
2 illumination over the visual field; they were placed approximately 2 cm away from subjects' eyes.  
3 Irradiance could not be measured directly in the magnet, but the light source was calibrated and  
4 photon flux estimated to be  $5 \times 10^{13} \text{ ph cm}^{-2} \text{ s}^{-1}$  (Power meter PM100D, Thorlabs with Silicon Power  
5 head S120VC), corresponding to an irradiance of  $20.7 \mu\text{W/cm}^2$  for the blue light and  $16.0 \mu\text{W/cm}^2$   
6 for the 620nm red light  
7 On the lux scale, to quantify the effective illuminance for human photopigments (Lucas et al., 2014),  
8 for a wavelength of 480nm and an irradiance of  $20.7 \mu\text{W/cm}^2$  we obtained the following values:  
9 photopic illuminance = 19.87 lux, melanopic illuminance (mRGCs) = 165.01 lux, rhodopic  
10 illuminance (rods) = 118.28 lux, cyanopic illuminance (S-cones) = 78.87 lux; chloropic illuminance  
11 (M-cones) = 63.1 lux, erythroptic illuminance (L-cones) = 32.97 lux.  
12 For a wavelength of 620nm and an irradiance of  $16.0 \mu\text{W/cm}^2$  we instead obtained: photopic  
13 illuminance = 41.71 lux, melanopic illuminance (mRGCs) = 0.13 lux, rhodopic illuminance (rods) =  
14 0.97 lux, cyanopic illuminance (S-cones) = 0 lux; chloropic illuminance (M-cones) = 16.37 lux,  
15 erythroptic illuminance (L-cones) = 51.92 lux.  
16 The light device produced no perceptible sounds or temperature change. The total amount of blue  
17 light received during the experiment was 4 orders of magnitude below the blue-light hazard threshold  
18 as defined by the International Commission on Non-Ionizing Radiation Protection (ICNIRP  
19 Guidelines 2013).

20

### 21 *fMRI paradigms*

22 The first paradigm tested was meant to investigate the possible role of mRGCs in a pure visual  
23 setting. Participants were exposed to blue or red lights for periods of 10s separated with 5s of  
24 complete darkness ( $<0.01$  lux), with a random colour alternation, for a total duration of 5 minutes  
25 (Figure 4-B).

1 In order to investigate mRGC-driven modulation of brain responses during a working memory task, a  
2 cognitive paradigm was constructed based on previous studies (Vandewalle et al., 2007, 2013)  
3 (Figure 4-B). The paradigm included 50s illumination periods under blue or red light exposure,  
4 separated by dark periods of 20 to 30s (mean 25s). While exposed to light or maintained in darkness,  
5 participants performed 35s blocks of either 0-back and 3-back auditory task separated by rest periods  
6 lasting 10 to 16s (mean 13s). Both auditory tasks consisted in series of consonants. The 0-back task  
7 was a simple letter detection task during which subjects were requested to state whether or not the  
8 consonant was an “r”. The 3-back task is a working memory task requesting to state whether each  
9 consonant was identical to the consonant presented three stimuli earlier. It is an executive task  
10 probing maintenance and updating of information as well as attention and auditory processing  
11 (Cohen et al., 1997, Collette et al., 2006).

12 Responses were given by pressing a button on a MR-compatible handgrip when the answer was yes.  
13 Stimuli consisted of nine Italian monosyllabic consonants (duration = 0.5 s, Inter-Stimulus Interval=  
14 2 s), produced using COGENT 2000 ([www.vislab.ucl.ac.uk/cogent.php](http://www.vislab.ucl.ac.uk/cogent.php)), implemented in MATLAB  
15 (MathWorks, MA), and transmitted to the participants using MR compatible headphones. Series of  
16 stimuli were constructed with 30% hits so that the difficulty level was similar in all blocks, were  
17 presented only once and were randomly assigned to a task block. Each auditory task block consisted  
18 of a series of 14 consonants. A total of 42 blocks were presented, 21 of 0-back and 21 of 3-back,  
19 randomly alternated. Each type of task was preceded by a short vocal instruction. The cognitive task  
20 was totally uncorrelated to the light condition, i.e. presentation of task blocks was independent from  
21 light changes, so that both the impact of light on prefrontal cognitive brain activity and occipital  
22 visual brain activity could be investigated separately. The duration of the cognitive paradigm was  
23 about 35 minutes.

24  
25  
26

## 1 **fMRI acquisition**

2 fMRI acquisitions were performed with a 1.5 T system (GE Medical System Signa HDx 15),  
3 equipped with an 8-channel brain phased array coil. The static magnetic field of the apparatus was  
4 therefore lower than previous 3T fMRI studies on the NIF impact of light (Vandewalle et al., 2007,  
5 2011, 2013). Since signal and signal-to-noise ratio (SNR) decrease non-linearly as a function of  
6 magnetic field, this implies that sensitivity of the apparatus was much lower than previously. Yet, the  
7 excellent access to the rare phenotype of interest at the University of Bologna, i.e. relative increase in  
8 mRGC photoreception in LHON patient, led us to postulate that the most prominent effects, i.e. the  
9 greater relative difference in mRGC/RGC output, would be detectable with the 1.5T apparatus.  
10 Functional MR images were acquired with a multislice T2\*-weighted gradient-echo-planar sequence  
11 using pure axial slice orientation (34 slices, thickness 4 mm, in-plane resolution 1.875x1.875 mm,  
12 field of view FOV=240x240 mm, matrix size=98x98x34, repetition time TR=3000 ms, echo time  
13 TE=40 ms, flip angle=90°). High-resolution volumetric structural images were acquired using a T1-  
14 weighted fast spoiled gradient echo (FSPGR) sequence, (TR=12.4 ms, TE=5.2 ms, inversion time  
15 TI=600 ms, flip angle=10°, matrix size=256x256 mm, FOV=256x256 mm, voxel size 1x1x1 mm).  
16 Acquisitions started with the visual cognitive paradigm, then the pure visual paradigm followed, and  
17 the structural images acquisitions.

18

## 19 **fMRI data analysis**

20 Analyses of fMRI data were performed with the FSL software (<https://fsl.fmrib.ox.ac.uk/fsl/>). Image  
21 pre-processing included motion correction through rigid body registration (MCFLIRT, Motion  
22 Correction FMRIB's Linear Image Registration Tool), high-pass filtering (cut-off 100s for pure  
23 visual paradigm and 150s for visual-cognitive paradigm), spatial smoothing (gaussian kernel FWHM  
24 5mm) and slice timing correction.

25 At the single subject level, changes in brain responses were estimated by using a general linear

26 model, in which aspects of interest were modelled using boxcar or stick functions convolved with a

1 double-gamma hemodynamic response function. In particular, for the pure visual paradigm, the  
2 following explanatory variables (EV) were included in the design matrix: blue and red (modelled  
3 with boxcar functions), blue on, blue off, red on and red off (modelled with stick functions).  
4 Movement parameters derived from realignment for motion correction were added as covariate of no  
5 interest. COPE (Contrast of Parameter Estimates) maps were generated for the following contrasts:  
6 blue, red, blue > red, blue < red, blue on, red on, blue on > red on, blue on < red on. Light offsets  
7 were included as regressors of no interest while transient effects in brain activity induced by light  
8 onset were considered as effect of interest.

9 Regarding the visual cognitive paradigm, boxcar functions were used to model 0-back task blocks, 3-  
10 back task blocks, blue illumination periods and red illumination periods. Stick functions were used  
11 for light onset and offset which were considered as covariate of no interest together with movement  
12 parameters. The following EVs were included in the design matrix: 0-back, 3-back, blue, red  
13 (modelled with boxcar functions), blue on, blue off, red on, red off (modelled with stick functions),  
14 and then the interactions between light and task: 0-back under blue, 0-back under red, 3-back under  
15 blue, 3-back under red. In all contrasts, executive brain responses were isolated by subtracting brain  
16 responses to the 0-back task from the brain responses to the 3back task. We assessed these brain  
17 responses irrespective of the light condition and then evaluated the impact of light on executive  
18 responses. COPE maps were generated for the following contrasts: 3-back > 0-back, blue, red, blue >  
19 red, blue < red, (3-back blue – 0-back blue) > (3-back red – 0-back red), [(3-back blue – 0-back blue)  
20 < (3-back red – 0-back red)].

21 Functional images were linearly aligned to structural images and structural images were non-linearly  
22 aligned to the MNI template. At the group level, comparisons between LHON patients and healthy  
23 controls (HC) were carried out with non-parametric statistics obtained by permutation methods (FSL  
24 randomise, with 5000 permutations). Age, sex and the average numbers of hours of light per day at  
25 the moment of MRI acquisitions were added as covariate of no interest. Comparisons were performed  
26 within pre-defined regions of interests: primary visual cortex for the visual effects and prefrontal

1 brain regions associated with working memory tasks for the visual-cognitive effect. Precisely, V1  
2 was defined based on Juelich histological atlas (Eickhoff et al., 2005) definition at 25% probability,  
3 while regions involved in working memory task were defined according to a recent meta-analysis  
4 results (Wang et al., 2019) by drawing a sphere of 10mm radius around each coordinate reported for  
5 all active main effect and load condition. Statistical inferences were made from statistical maps that  
6 were corrected for multiple comparisons with a threshold free cluster enhancement (TFCE) method,  
7 considering significant results at  $p < 0.05$ . An analogous approach was used to investigate possible  
8 correlations between fMRI results and patients ophthalmological data.

9

## 10 **Demographic and behavioural data analysis**

11 Normal distribution of all data types was checked with a Shapiro-Wilk test. Gender was compared  
12 between the two groups with Pearson's  $\chi^2$  test, while age and the average hours of light were  
13 compared with a t-test. The performances in the two training sessions of the n-back cognitive tasks  
14 were compared between sessions with a paired t-test, and between patients and controls with a t-test.  
15 As for the performance of the cognitive task during MR acquisitions, a two-way mixed design  
16 ANOVA was performed, with group (patients or controls) as independent factor and light conditions  
17 (blue, red, darkness) as the three-level repeated measures.

18

## 19 **Ophthalmological evaluations**

20 Both patients and controls performed an ophthalmological evaluation which included the assessment  
21 of visual acuity (ETDRS chart), measurement of intraocular pressure (IOP), evaluation of the anterior  
22 chamber by means of slit lamp and of the fundus oculi by means of direct ophthalmoscopy.  
23 Moreover, participants performed evaluation of colour vision (Ishihara's Test for Colour-Blindness-  
24 Kanehara Shupman Co., Tokyo, Japan), computerized visual field (Humphrey, Zeiss) and optical  
25 coherence tomography (OCT) (Stratus, Zeiss). For correlation analysis the following metrics were  
26 used: visual acuity, mean deviation for computerized visual fields, retinal nerve fibre layer (RNFL)



1 thickness average and single quadrants (temporal, superior, nasal and inferior) thickness (for more  
2 details on OCT methods see Barboni et al., 2010).

3

4

#### 5 Supplementary material

6 Supplementary file 1: Supplementary Figure 1. Significant (TFCE-corrected  $p < 0.05$ ) group-level  
7 results for responses to 3-back task compared to the control condition (0-back) irrespectively of light  
8 conditions.

9 Supplementary file 2: Supplementary Table 1. Brain response to monochromatic light stimulation.

10 Supplementary file 3: Supplementary Table 2. Cluster data for group-level results for responses to 3-  
11 back task compared to the control condition (0-back) irrespectively of light condition.

12 Supplementary file 4: Supplementary Table 3. Brain response in LHON patients is modulated by  
13 light conditions during the attentive task.

14

#### 15 Acknowledgments

16 We thank Fondazione del Monte di Bologna e Ravenna for the financial support. It had no role in  
17 study desigg, in the collection, analysis and interpretation of data, in the writing of the report and in  
18 the decision to submit the article for publication.

19

20

21

22

23

24

25

26

27

28

29

30

31

32

33

34

35

36

37

38

39

## 1   **References**

- 2
- 3       1. Allen, A. E., Storchi, R., Martial, F. P., Petersen, R. S., Montemurro, M. A., Brown, T. M., &  
4       Lucas, R. J. (2014). Melanopsin-driven light adaptation in mouse vision. *Current biology :  
5       CB*, 24(21), 2481–2490. <https://doi.org/10.1016/j.cub.2014.09.015>
- 6       2. Allen, A. E., Storchi, R., Martial, F. P., Bedford, R. A., & Lucas, R. J. (2017). Melanopsin  
7       Contributions to the Representation of Images in the Early Visual System. *Current biology :  
8       CB*, 27(11), 1623–1632.e4. <https://doi.org/10.1016/j.cub.2017.04.046>
- 9       3. Allen, A. E., Martial, F. P., & Lucas, R. J. (2019). Form vision from melanopsin in  
10       humans. *Nature communications*, 10(1), 2274. <https://doi.org/10.1038/s41467-019-10113-3>
- 11       4. Barboni, P., Carbonelli, M., Savini, G., Foscarini, B., Parisi, V., Valentino, M. L., Carta, A.,  
12       De Negri, A., Sadun, F., Zeviani, M., Sadun, A. A., Schimpf, S., Wissinger, B., & Carelli, V.  
13       (2010). OPA1 mutations associated with dominant optic atrophy influence optic nerve head  
14       size. *Ophthalmology*, 117(8), 1547–1553. <https://doi.org/10.1016/j.ophtha.2009.12.042>
- 15       5. Barcella, V., Rocca, M. A., Bianchi-Marzoli, S., Milesi, J., Melzi, L., Falini, A., Pierro, L., &  
16       Filippi, M. (2010). Evidence for retrochiasmatic tissue loss in Leber's hereditary optic  
17       neuropathy. *Human brain mapping*, 31(12), 1900–1906. <https://doi.org/10.1002/hbm.20985>
- 18       6. Berson, D. M., Dunn, F. A., & Takao, M. (2002). Phototransduction by retinal ganglion cells  
19       that set the circadian clock. *Science (New York, N.Y.)*, 295(5557), 1070–1073.  
20       <https://doi.org/10.1126/science.1067262>
- 21       7. Beck, A. T., Ward, C. H., Mendelson, M., Mock, J., & Erbaugh, J. (1961). An inventory for  
22       measuring depression. *Archives of general psychiatry*, 4, 561–571.  
23       <https://doi.org/10.1001/archpsyc.1961.01710120031004>
- 24       8. Beck, A. T., Epstein, N., Brown, G., & Steer, R. A. (1988). An inventory for measuring  
25       clinical anxiety: psychometric properties. *Journal of consulting and clinical  
26       psychology*, 56(6), 893–897. <https://doi.org/10.1037//0022-006x.56.6.893>
- 27       9. Brown, T. M., Gias, C., Hatori, M., Keding, S. R., Semo, M., Coffey, P. J., Gigg, J., Piggins,  
28       H. D., Panda, S., & Lucas, R. J. (2010). Melanopsin contributions to irradiance coding in the  
29       thalamo-cortical visual system. *PLoS biology*, 8(12), e1000558.  
30       <https://doi.org/10.1371/journal.pbio.1000558>
- 31       10. Brown TM, Tsujimura S, Allen AE, et al. Melanopsin-based brightness discrimination in  
32       mice and humans. *Curr Biol*. 2012;22(12):1134-1141. doi:10.1016/j.cub.2012.04.039
- 33       11. Buysse, D. J., Reynolds, C. F., 3rd, Monk, T. H., Berman, S. R., & Kupfer, D. J. (1989). The  
34       Pittsburgh Sleep Quality Index: a new instrument for psychiatric practice and

- 1 research. *Psychiatry research*, 28(2), 193–213. [https://doi.org/10.1016/0165-1781\(89\)90047-](https://doi.org/10.1016/0165-1781(89)90047-4)  
2 4
- 3 12. Carelli, V., Ross-Cisneros, F. N., & Sadun, A. A. (2004). Mitochondrial dysfunction as a  
4 cause of optic neuropathies. *Progress in retinal and eye research*, 23(1), 53–89.  
5 <https://doi.org/10.1016/j.preteyeres.2003.10.003>
- 6 13. Chellappa, S. L., Ly, J. Q., Meyer, C., Balteau, E., Degueldre, C., Luxen, A., Phillips, C.,  
7 Cooper, H. M., & Vandewalle, G. (2014). Photic memory for executive brain  
8 responses. *Proceedings of the National Academy of Sciences of the United States of*  
9 *America*, 111(16), 6087–6091. <https://doi.org/10.1073/pnas.1320005111>
- 10 14. Cohen, J. D., Perlstein, W. M., Braver, T. S., Nystrom, L. E., Noll, D. C., Jonides, J., &  
11 Smith, E. E. (1997). Temporal dynamics of brain activation during a working memory  
12 task. *Nature*, 386(6625), 604–608. <https://doi.org/10.1038/386604a0>
- 13 15. Collette, F., Hogge, M., Salmon, E., & Van der Linden, M. (2006). Exploration of the neural  
14 substrates of executive functioning by functional neuroimaging. *Neuroscience*, 139(1), 209–  
15 221. <https://doi.org/10.1016/j.neuroscience.2005.05.035>
- 16 16. Czeisler, C. A., Shanahan, T. L., Klerman, E. B., Martens, H., Brotman, D. J., Emens, J. S.,  
17 Klein, T., & Rizzo, J. F., 3rd (1995). Suppression of melatonin secretion in some blind  
18 patients by exposure to bright light. *The New England journal of medicine*, 332(1), 6–11.  
19 <https://doi.org/10.1056/NEJM199501053320102>
- 20 17. Dacey, D. M., Liao, H. W., Peterson, B. B., Robinson, F. R., Smith, V. C., Pokorny, J., Yau,  
21 K. W., & Gamlin, P. D. (2005). Melanopsin-expressing ganglion cells in primate retina signal  
22 colour and irradiance and project to the LGN. *Nature*, 433(7027), 749–754.  
23 <https://doi.org/10.1038/nature03387>
- 24 18. Davis KE, Eleftheriou CG, Allen AE, et al. Melanopsin-Derived Visual Responses under  
25 Light Adapted Conditions in the Mouse dLGN. 2015. PLoS One. 10:1–21. DOI:  
26 10.1371/journal.pone.0123424
- 27 19. Davis, K. E., Eleftheriou, C. G., Allen, A. E., Procyk, C. A., & Lucas, R. J. (2015).  
28 Melanopsin-derived visual responses under light adapted conditions in the mouse  
29 dLGN. *PloS one*, 10(3), e0123424. <https://doi.org/10.1371/journal.pone.0123424>
- 30 20. Ecker, J. L., Dumitrescu, O. N., Wong, K. Y., Alam, N. M., Chen, S. K., LeGates, T., Renna,  
31 J. M., Prusky, G. T., Berson, D. M., & Hattar, S. (2010). Melanopsin-expressing retinal  
32 ganglion-cell photoreceptors: cellular diversity and role in pattern vision. *Neuron*, 67(1), 49–  
33 60. <https://doi.org/10.1016/j.neuron.2010.05.023>

- 1 21. Eickhoff, S. B., Stephan, K. E., Mohlberg, H., Grefkes, C., Fink, G. R., Amunts, K., & Zilles,  
2 K. (2005). A new SPM toolbox for combining probabilistic cytoarchitectonic maps and  
3 functional imaging data. *NeuroImage*, *25*(4), 1325–1335.  
4 <https://doi.org/10.1016/j.neuroimage.2004.12.034>
- 5 22. Enezi, J. a., Revell, V., Brown, T., Wynne, J., Schlangen, L., & Lucas, R. (2011). A  
6 "melanopic" spectral efficiency function predicts the sensitivity of melanopsin photoreceptors  
7 to polychromatic lights. *Journal of biological rhythms*, *26*(4), 314–323.  
8 <https://doi.org/10.1177/0748730411409719>
- 9 23. Gaggioni, G., Maquet, P., Schmidt, C., Dijk, D. J., & Vandewalle, G. (2014). Neuroimaging,  
10 cognition, light and circadian rhythms. *Frontiers in systems neuroscience*, *8*, 126.  
11 <https://doi.org/10.3389/fnsys.2014.00126>
- 12 24. Gooley, J. J., Ho Mien, I., St Hilaire, M. A., Yeo, S. C., Chua, E. C., van Reen, E., Hanley, C.  
13 J., Hull, J. T., Czeisler, C. A., & Lockley, S. W. (2012). Melanopsin and rod-cone  
14 photoreceptors play different roles in mediating pupillary light responses during exposure to  
15 continuous light in humans. *The Journal of neuroscience : the official journal of the Society*  
16 *for Neuroscience*, *32*(41), 14242–14253. <https://doi.org/10.1523/JNEUROSCI.1321-12.2012>
- 17 25. Güler, A. D., Ecker, J. L., Lall, G. S., Haq, S., Altimus, C. M., Liao, H. W., Barnard, A. R.,  
18 Cahill, H., Badea, T. C., Zhao, H., Hankins, M. W., Berson, D. M., Lucas, R. J., Yau, K. W.,  
19 & Hattar, S. (2008). Melanopsin cells are the principal conduits for rod-cone input to non-  
20 image-forming vision. *Nature*, *453*(7191), 102–105. <https://doi.org/10.1038/nature06829>
- 21 26. Hankins, M. W., Peirson, S. N., & Foster, R. G. (2008). Melanopsin: an exciting  
22 photopigment. *Trends in neurosciences*, *31*(1), 27–36.  
23 <https://doi.org/10.1016/j.tins.2007.11.002>
- 24 27. Hannibal, J., Kankipati, L., Strang, C. E., Peterson, B. B., Dacey, D., & Gamlin, P. D. (2014).  
25 Central projections of intrinsically photosensitive retinal ganglion cells in the macaque  
26 monkey. *The Journal of comparative neurology*, *522*(10), 2231–2248.  
27 <https://doi.org/10.1002/cne.23588>
- 28 28. Hatori, M., Le, H., Vollmers, C., Keding, S. R., Tanaka, N., Buch, T., Waisman, A., Schmedt,  
29 C., Jegla, T., & Panda, S. (2008). Inducible ablation of melanopsin-expressing retinal  
30 ganglion cells reveals their central role in non-image forming visual responses. *PLoS*  
31 *one*, *3*(6), e2451. <https://doi.org/10.1371/journal.pone.0002451>
- 32 29. Hattar, S., Kumar, M., Park, A., Tong, P., Tung, J., Yau, K. W., & Berson, D. M. (2006).  
33 Central projections of melanopsin-expressing retinal ganglion cells in the mouse. *The Journal*  
34 *of comparative neurology*, *497*(3), 326–349. <https://doi.org/10.1002/cne.20970>

- 1 30. Horne JA, Ostberg O. A self-assessment questionnaire to determine morningness-eveningness  
2 in human circadian rhythms. *Int J Chronobiol.* 1976;4(2):97-110
- 3 31. Hull, J. T., Czeisler, C. A., & Lockley, S. W. (2018). Suppression of Melatonin Secretion in  
4 Totally Visually Blind People by Ocular Exposure to White Light: Clinical  
5 Characteristics. *Ophthalmology*, 125(8), 1160–1171.  
6 <https://doi.org/10.1016/j.ophtha.2018.01.036>
- 7 32. Hung, S. M., Milea, D., Rukmini, A. V., Najjar, R. P., Tan, J. H., Viénot, F., Dubail, M.,  
8 Tow, S., Aung, T., Gooley, J. J., & Hsieh, P. J. (2017). Cerebral neural correlates of  
9 differential melanopic photic stimulation in humans. *NeuroImage*, 146, 763–769.  
10 <https://doi.org/10.1016/j.neuroimage.2016.09.061>
- 11 33. International Commission on Non-Ionizing Radiation Protection. ICNIRP (2013) guidelines  
12 on limits of exposure to incoherent visible and infrared radiation. *Health Phys*,105(1):74–96,  
13 2013.
- 14 34. Johnson, J., Wu, V., Donovan, M., Majumdar, S., Rentería, R. C., Porco, T., Van Gelder, R.  
15 N., & Copenhagen, D. R. (2010). Melanopsin-dependent light avoidance in neonatal  
16 mice. *Proceedings of the National Academy of Sciences of the United States of*  
17 *America*, 107(40), 17374–17378. <https://doi.org/10.1073/pnas.1008533107>
- 18 35. Kawasaki, A., Herbst, K., Sander, B., & Milea, D. (2010). Selective wavelength pupillometry  
19 in Leber hereditary optic neuropathy. *Clinical & experimental ophthalmology*, 38(3), 322–  
20 324. <https://doi.org/10.1111/j.1442-9071.2010.02212.x>
- 21 36. La Morgia, C., Ross-Cisneros, F. N., Sadun, A. A., Hannibal, J., Munarini, A., Mantovani, V.,  
22 Barboni, P., Cantalupo, G., Tozer, K. R., Sancisi, E., Salomao, S. R., Moraes, M. N., Moraes-  
23 Filho, M. N., Heegaard, S., Milea, D., Kjer, P., Montagna, P., & Carelli, V. (2010).  
24 Melanopsin retinal ganglion cells are resistant to neurodegeneration in mitochondrial optic  
25 neuropathies. *Brain : a journal of neurology*, 133(Pt 8), 2426–2438.  
26 <https://doi.org/10.1093/brain/awq155>
- 27 37. Langel, J. L., Smale, L., Esquivia, G., & Hannibal, J. (2015). Central melanopsin projections  
28 in the diurnal rodent, *Arvicanthis niloticus*. *Frontiers in neuroanatomy*, 9, 93.  
29 <https://doi.org/10.3389/fnana.2015.00093>
- 30 38. Lucas, R. J., Peirson, S. N., Berson, D. M., Brown, T. M., Cooper, H. M., Czeisler, C. A.,  
31 Figueiro, M. G., Gamlin, P. D., Lockley, S. W., O'Hagan, J. B., Price, L. L., Provencio, I.,  
32 Skene, D. J., & Brainard, G. C. (2014). Measuring and using light in the melanopsin  
33 age. *Trends in neurosciences*, 37(1), 1–9. <https://doi.org/10.1016/j.tins.2013.10.004>

- 1 39. Manners, D. N., Rizzo, G., La Morgia, C., Tonon, C., Testa, C., Barboni, P., Malucelli, E.,  
2 Valentino, M. L., Caporali, L., Strobbe, D., Carelli, V., & Lodi, R. (2015). Diffusion Tensor  
3 Imaging Mapping of Brain White Matter Pathology in Mitochondrial Optic  
4 Neuropathies. *AJNR. American journal of neuroradiology*, *36*(7), 1259–1265.  
5 <https://doi.org/10.3174/ajnr.A4272>
- 6 40. Mascialino, B., Leinonen, M., & Meier, T. (2012). Meta-analysis of the prevalence of Leber  
7 hereditary optic neuropathy mtDNA mutations in Europe. *European journal of*  
8 *ophthalmology*, *22*(3), 461–465. <https://doi.org/10.5301/ejo.5000055>
- 9 41. McGlashan, E. M., Poudel, G. R., Vidafar, P., Drummond, S., & Cain, S. W. (2018). Imaging  
10 Individual Differences in the Response of the Human Suprachiasmatic Area to  
11 Light. *Frontiers in neurology*, *9*, 1022. <https://doi.org/10.3389/fneur.2018.01022>
- 12 42. Meyer, C., Muto, V., Jaspar, M., Kussé, C., Lambot, E., Chellappa, S. L., Degueldre, C.,  
13 Balteau, E., Luxen, A., Middleton, B., Archer, S. N., Collette, F., Dijk, D. J., Phillips, C.,  
14 Maquet, P., & Vandewalle, G. (2016). Seasonality in human cognitive brain  
15 responses. *Proceedings of the National Academy of Sciences of the United States of*  
16 *America*, *113*(11), 3066–3071. <https://doi.org/10.1073/pnas.1518129113>
- 17 43. Mitolo, M., Tonon, C., La Morgia, C., Testa, C., Carelli, V., & Lodi, R. (2018). Effects of  
18 Light Treatment on Sleep, Cognition, Mood, and Behavior in Alzheimer's Disease: A  
19 Systematic Review. *Dementia and geriatric cognitive disorders*, *46*(5-6), 371–384.  
20 <https://doi.org/10.1159/000494921>
- 21 44. Moulard, J. W., Stinchcombe, A. R., Forger, D. B., Brown, T. M., & Lucas, R. J. (2017).  
22 Responses to Spatial Contrast in the Mouse Suprachiasmatic Nuclei. *Current biology :*  
23 *CB*, *27*(11), 1633–1640.e3. <https://doi.org/10.1016/j.cub.2017.04.039>
- 24 45. Moura, A. L., Nagy, B. V., La Morgia, C., Barboni, P., Oliveira, A. G., Salomão, S. R.,  
25 Berezovsky, A., de Moraes-Filho, M. N., Chicani, C. F., Belfort, R., Jr, Carelli, V., Sadun, A.  
26 A., Hood, D. C., & Ventura, D. F. (2013). The pupil light reflex in Leber's hereditary optic  
27 neuropathy: evidence for preservation of melanopsin-expressing retinal ganglion  
28 cells. *Investigative ophthalmology & visual science*, *54*(7), 4471–4477.  
29 <https://doi.org/10.1167/iovs.12-11137>
- 30 46. Netzer, N. C., Stoohs, R. A., Netzer, C. M., Clark, K., & Strohl, K. P. (1999). Using the  
31 Berlin Questionnaire to identify patients at risk for the sleep apnea syndrome. *Annals of*  
32 *internal medicine*, *131*(7), 485–491. [https://doi.org/10.7326/0003-4819-131-7-199910050-](https://doi.org/10.7326/0003-4819-131-7-199910050-00002)  
33 00002

- 1 47. Otero T.M., Barker L.A. 2014. The Frontal Lobes and Executive Functioning. In: Goldstein  
2 S., Naglieri J. (eds) Handbook of Executive Functioning. Springer, New York, NY.
- 3 48. Provencio, I., Rollag, M. D., & Castrucci, A. M. (2002). Photoreceptive net in the mammalian  
4 retina. This mesh of cells may explain how some blind mice can still tell day from  
5 night. *Nature*, 415(6871), 493. <https://doi.org/10.1038/415493a>
- 6 49. Rizzo, G., Tozer, K. R., Tonon, C., Manners, D., Testa, C., Malucelli, E., Valentino, M. L.,  
7 La Morgia, C., Barboni, P., Randhawa, R. S., Ross-Cisneros, F. N., Sadun, A. A., Carelli, V.,  
8 & Lodi, R. (2012). Secondary post-geniculate involvement in Leber's hereditary optic  
9 neuropathy. *PloS one*, 7(11), e50230. <https://doi.org/10.1371/journal.pone.0050230>
- 10 50. Sand, A., Schmidt, T. M., & Kofuji, P. (2012). Diverse types of ganglion cell photoreceptors  
11 in the mammalian retina. *Progress in retinal and eye research*, 31(4), 287–302.  
12 <https://doi.org/10.1016/j.preteyeres.2012.03.003>
- 13 51. Schroeder, M. M., Harrison, K. R., Jaeckel, E. R., Berger, H. N., Zhao, X., Flannery, M. P., St  
14 Pierre, E. C., Pateqi, N., Jachimska, A., Chervenak, A. P., & Wong, K. Y. (2018). The Roles  
15 of Rods, Cones, and Melanopsin in Photoresponses of M4 Intrinsically Photosensitive Retinal  
16 Ganglion Cells (ipRGCs) and Optokinetic Visual Behavior. *Frontiers in cellular  
17 neuroscience*, 12, 203. <https://doi.org/10.3389/fncel.2018.00203>
- 18 52. Schmidt, T. M., Alam, N. M., Chen, S., Kofuji, P., Li, W., Prusky, G. T., & Hattar, S. (2014).  
19 A role for melanopsin in alpha retinal ganglion cells and contrast detection. *Neuron*, 82(4),  
20 781–788. <https://doi.org/10.1016/j.neuron.2014.03.022>
- 21 53. Sonoda, T., & Schmidt, T. M. (2016). Re-evaluating the Role of Intrinsically Photosensitive  
22 Retinal Ganglion Cells: New Roles in Image-Forming Functions. *Integrative and comparative  
23 biology*, 56(5), 834–841. <https://doi.org/10.1093/icb/icw066>
- 24 54. Spitschan, M., Bock, A. S., Ryan, J., Frazzetta, G., Brainard, D. H., & Aguirre, G. K. (2017).  
25 The human visual cortex response to melanopsin-directed stimulation is accompanied by a  
26 distinct perceptual experience. *Proceedings of the National Academy of Sciences of the  
27 United States of America*, 114(46), 12291–12296. <https://doi.org/10.1073/pnas.1711522114>
- 28 55. Storchi, R., Milosavljevic, N., Eleftheriou, C. G., Martial, F. P., Orłowska-Feuer, P., Bedford,  
29 R. A., Brown, T. M., Montemurro, M. A., Petersen, R. S., & Lucas, R. J. (2015). Melanopsin-  
30 driven increases in maintained activity enhance thalamic visual response reliability across a  
31 simulated dawn. *Proceedings of the National Academy of Sciences of the United States of  
32 America*, 112(42), E5734–E5743. <https://doi.org/10.1073/pnas.1505274112>
- 33 56. Vandewalle, G., Schmidt, C., Albouy, G., Sterpenich, V., Darsaud, A., Rauchs, G., Berken, P.  
34 Y., Balteau, E., Degueldre, C., Luxen, A., Maquet, P., & Dijk, D. J. (2007). Brain responses

- 1 to violet, blue, and green monochromatic light exposures in humans: prominent role of blue  
2 light and the brainstem. *PLoS one*, 2(11), e1247. <https://doi.org/10.1371/journal.pone.0001247>
- 3 57. Vandewalle, G., Maquet, P., & Dijk, D. J. (2009). Light as a modulator of cognitive brain  
4 function. *Trends in cognitive sciences*, 13(10), 429–438.  
5 <https://doi.org/10.1016/j.tics.2009.07.004>
- 6 58. Vandewalle, G., Hébert, M., Beaulieu, C., Richard, L., Daneault, V., Garon, M. L., Leblanc,  
7 J., Grandjean, D., Maquet, P., Schwartz, S., Dumont, M., Doyon, J., & Carrier, J. (2011).  
8 Abnormal hypothalamic response to light in seasonal affective disorder. *Biological*  
9 *psychiatry*, 70(10), 954–961. <https://doi.org/10.1016/j.biopsych.2011.06.022>
- 10 59. Vandewalle, G., Collignon, O., Hull, J. T., Daneault, V., Albouy, G., Lepore, F., Phillips, C.,  
11 Doyon, J., Czeisler, C. A., Dumont, M., Lockley, S. W., & Carrier, J. (2013). Blue light  
12 stimulates cognitive brain activity in visually blind individuals. *Journal of cognitive*  
13 *neuroscience*, 25(12), 2072–2085. [https://doi.org/10.1162/jocn\\_a\\_00450](https://doi.org/10.1162/jocn_a_00450)
- 14 60. Vandewalle, G., van Ackeren, M. J., Daneault, V., Hull, J. T., Albouy, G., Lepore, F., Doyon,  
15 J., Czeisler, C. A., Dumont, M., Carrier, J., Lockley, S. W., & Collignon, O. (2018). Light  
16 modulates oscillatory alpha activity in the occipital cortex of totally visually blind individuals  
17 with intact non-image-forming photoreception. *Scientific reports*, 8(1), 16968.  
18 <https://doi.org/10.1038/s41598-018-35400-9>
- 19 61. Vignatelli, L., Plazzi, G., Barbato, A., Ferini-Strambi, L., Manni, R., Pompei, F.,  
20 D'Alessandro, R., & GINSEN (Gruppo Italiano Narcolessia Studio Epidemiologico Nazionale  
21 (2003). Italian version of the Epworth sleepiness scale: external validity. *Neurological*  
22 *sciences : official journal of the Italian Neurological Society and of the Italian Society of*  
23 *Clinical Neurophysiology*, 23(6), 295–300. <https://doi.org/10.1007/s100720300004>
- 24 62. Wang, H., He, W., Wu, J., Zhang, J., Jin, Z., & Li, L. (2019). A coordinate-based meta-  
25 analysis of the n-back working memory paradigm using activation likelihood  
26 estimation. *Brain and cognition*, 132, 1–12. <https://doi.org/10.1016/j.bandc.2019.01.002>
- 27 63. Zaidi, F. H., Hull, J. T., Peirson, S. N., Wulff, K., Aeschbach, D., Gooley, J. J., Brainard, G.  
28 C., Gregory-Evans, K., Rizzo, J. F., 3rd, Czeisler, C. A., Foster, R. G., Moseley, M. J., &  
29 Lockley, S. W. (2007). Short-wavelength light sensitivity of circadian, pupillary, and visual  
30 awareness in humans lacking an outer retina. *Current biology : CB*, 17(24), 2122–2128.  
31 <https://doi.org/10.1016/j.cub.2007.11.034>
- 32 64. Zele, A. J., Adhikari, P., Feigl, B., & Cao, D. (2018a). Cone and melanopsin contributions to  
33 human brightness estimation. *Journal of the Optical Society of America. A, Optics, image*  
34 *science, and vision*, 35(4), B19–B25. <https://doi.org/10.1364/JOSAA.35.000B19>



1 65. Zele, A. J., Feigl, B., Adhikari, P., Maynard, M. L., & Cao, D. (2018b). Melanopsin  
2 photoreception contributes to human visual detection, temporal and colour  
3 processing. *Scientific reports*, 8(1), 3842. <https://doi.org/10.1038/s41598-018-22197-w>

4
